# Supplementary material for: Amiprophosmethyl-induced efficient in vitro production of polyploids in raphanobrassica with the aid of aminoethoxyvinylglycine (AVG) in the culture medium
Source: PubMed Central journal article supplement — Breed Sci. 2015 Dec 1;65(5):396–402. doi: 10.1270/jsbbs.65.396 (PMC4671700; doi:10.1270/jsbbs.65.396), 2015-12-01
Supplement: 65_396_1.pdf [file 65_396_1.pdf]

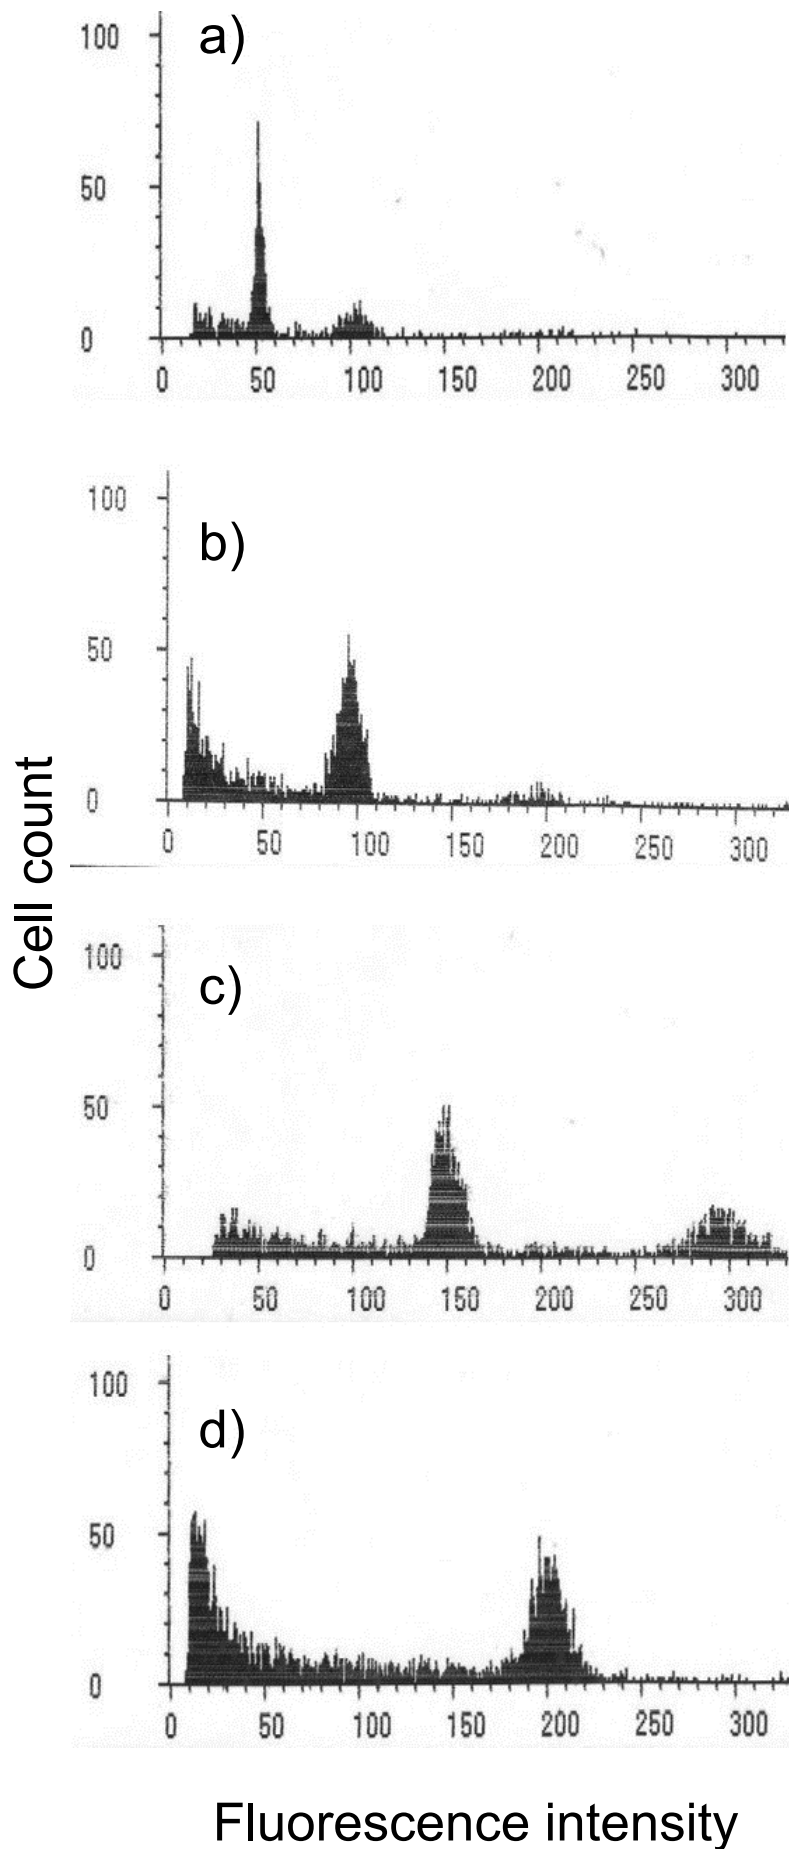

Supplemental Fig. 1. Flow cytometric analysis on the ploidy level of amyprophos-methyl treated plants, a) diploid, b) tetraploid, c) hexaploid, and d) octaploid.
